# Supplementary material for: Patient acceptable symptom state and treatment failure threshold values for work productivity and activity Impairment and EQ-5D-5L in osteoarthritis
Source: Springer Nature journal article supplement (doi:10.1007/s11136-024-03602-6), 2024-02-26
Supplement: MOESM1 [file 26789114]

**Title:** Patient acceptable symptom state and treatment failure threshold values for work productivity and activity Impairment and EQ-5D-5L in osteoarthritis

**Journal:** Quality of Life Research

**Authors:** Ali Kiadaliri, Anna Cronström, Leif E Dahlberg, L Stefan Lohmander

**Correspondence to:** Ali Kiadaliri, Skåne University Hospital, Clinical Epidemiology Unit, Remissgatan 4, SE-221 85 Lund, Sweden ([ali.kiadaliri@med.lu.se](mailto:ali.kiadaliri@med.lu.se)).

**Table A1. Patient acceptable symptom state (PASS) and treatment failure (TF) thresholds (95% confidence intervals) for EQ-5D-5L and Work Productivity and Activity Impairment (WPAI) among participants with responses at both 3- and 12-month follow ups (n=2,681).**

|                                            | PASS              |                   | TF                |                   |
|--------------------------------------------|-------------------|-------------------|-------------------|-------------------|
|                                            | 3-Month           | 12-month          | 3-Month           | 12-month          |
| Hypothetical-based EQ-5D-5L score          | 0.92 (0.92, 0.92) | 0.91 (0.91, 0.92) | 0.79 (0.77, 0.81) | 0.75 (0.73, 0.77) |
| Experience-based EQ-5D-5L score            | 0.88 (0.87, 0.88) | 0.87 (0.86, 0.87) | 0.77 (0.76, 0.79) | 0.75 (0.73, 0.77) |
| WPAI– overall work impairment <sup>a</sup> | 16 (14, 17)       | 16 (14, 17)       | 31 (26, 35)       | 33 (29, 39)       |
| WPAI–activity impairment                   | 25 (24, 26)       | 26 (25, 27)       | 48 (45, 51)       | 49 (45, 52)       |

<sup>a</sup> Employed participants aged 70 years and younger at enrolment (n=925).

Table A2. Patient acceptable symptom state (PASS) and treatment failure (TF) thresholds (95% confidence intervals) for EQ-5D-5L at 3- and 12-month after enrolment in the digital program, stratified by osteoarthritis site.

|                                   | PASS              |                   |                       | TF                |                   |                       |
|-----------------------------------|-------------------|-------------------|-----------------------|-------------------|-------------------|-----------------------|
|                                   | Knee OA           | Hip OA            | Difference (knee-hip) | Knee OA           | Hip OA            | Difference (knee-hip) |
| <b>3-Month</b>                    | <b>N=8756</b>     | <b>N=5851</b>     |                       | <b>N=8756</b>     | <b>N=5851</b>     |                       |
| Hypothetical-based EQ-5D-5L score | 0.92 (0.92, 0.92) | 0.91 (0.91, 0.91) | 0.01 (0.01, 0.02)     | 0.79 (0.78, 0.80) | 0.74 (0.72, 0.75) | 0.05 (0.04, 0.07)     |
| Experience-based EQ-5D-5L score   | 0.88 (0.88, 0.88) | 0.87 (0.86, 0.87) | 0.01 (0.01, 0.02)     | 0.78 (0.78, 0.79) | 0.74 (0.73, 0.75) | 0.04 (0.03, 0.05)     |
| <b>12-month</b>                   | <b>N=1677</b>     | <b>N=1030</b>     |                       | <b>N=1677</b>     | <b>N=1030</b>     |                       |
| Hypothetical-based EQ-5D-5L score | 0.91 (0.91, 0.92) | 0.91 (0.90, 0.92) | 0.00 (-0.01, 0.01)    | 0.78 (0.75, 0.81) | 0.72 (0.67, 0.75) | 0.06 (0.02, 0.11)     |
| Experience-based EQ-5D-5L score   | 0.87 (0.87, 0.88) | 0.86 (0.86, 0.87) | 0.01 (0.00, 0.02)     | 0.78 (0.75, 0.80) | 0.73 (0.70, 0.75) | 0.05 (0.02, 0.08)     |

Table A3. Patient acceptable symptom state (PASS) and treatment failure (TF) thresholds (95% confidence intervals) for Work Productivity and Activity Impairment (WPAI) at 3- and 12-month after enrolment in the digital program, stratified by osteoarthritis site.

|                                            | PASS          |               |                       | TF            |               |                       |
|--------------------------------------------|---------------|---------------|-----------------------|---------------|---------------|-----------------------|
|                                            | Knee OA       | Hip OA        | Difference (knee-hip) | Knee OA       | Hip OA        | Difference (knee-hip) |
| <b>3-Month</b>                             | <b>N=8756</b> | <b>N=5851</b> |                       | <b>N=8756</b> | <b>N=5851</b> |                       |
| WPAI– overall work impairment <sup>a</sup> | 16 (15, 17)   | 15 (14, 16)   | 0.6 (-0.6, 1.7)       | 29 (27, 32)   | 29 (27, 32)   | 0.3 (-3.4, 3.9)       |
| WPAI–activity impairment                   | 26 (26, 27)   | 26 (25, 26)   | 0.5 (-0.2, 1.3)       | 48 (47,50)    | 51 (49, 53)   | -2.6 (-4.8, -0.4)     |
| <b>12-month</b>                            | <b>N=1677</b> | <b>N=1030</b> |                       | <b>N=1677</b> | <b>N=1030</b> |                       |
| WPAI– overall work impairment <sup>b</sup> | 16 (14, 18)   | 15 (13, 17)   | 0.8 (-1.9, 3.5)       | 35 (27, 42)   | 32 (25, 40)   | 2.4 (-8.2, 13.4)      |
| WPAI–activity impairment                   | 27 (26, 28)   | 25 (24, 26)   | 1.6 (-0.1, 3.4)       | 45 (40, 50)   | 52 (48, 57)   | -7.0 (-13.1, -0.2)    |

<sup>a</sup> Employed participants aged 70 years and younger at enrolment (n=3,409 for knee OA and n=2,155 for hip OA).

<sup>b</sup> Employed participants aged 70 years and younger at enrolment (n=574 for knee OA and n=359 for hip OA).

Table A4. Patient acceptable symptom state (PASS) and treatment failure (TF) thresholds (95% confidence intervals) for EQ-5D-5L and Work Productivity and Activity Impairment (WPAI) at 3- and 12-month after enrolment in the digital program, stratified by age group.

|                                   | PASS              |                   |                            | TF                |                   |                            |
|-----------------------------------|-------------------|-------------------|----------------------------|-------------------|-------------------|----------------------------|
|                                   | ≤65 years         | >65 years         | Difference (older-younger) | ≤65 years         | >65 years         | Difference (older-younger) |
| <b>3-Month</b>                    | <b>N=7929</b>     | <b>N=6678</b>     |                            | <b>N=7929</b>     | <b>N=6678</b>     |                            |
| Hypothetical-based EQ-5D-5L score | 0.91 (0.91, 0.92) | 0.92 (0.92, 0.92) | 0.01 (0.00, 0.01)          | 0.76 (0.75, 0.77) | 0.78 (0.77, 0.79) | 0.02 (0.01, 0.04)          |
| Experience-based EQ-5D-5L score   | 0.87 (0.87, 0.87) | 0.88 (0.87, 0.88) | 0.00 (0.00, 0.01)          | 0.76 (0.75, 0.77) | 0.77 (0.76, 0.78) | 0.01 (0.00, 0.02)          |
| WPAI–activity impairment          | 25 (25, 26)       | 27 (26, 27)       | 1.7 (1.0, 2.4)             | 49 (47, 50)       | 51 (50, 53)       | 2.5 (0.2, 4.8)             |
| <b>12-month</b>                   | <b>N=1434</b>     | <b>N=1273</b>     |                            | <b>N=1434</b>     | <b>N=1273</b>     |                            |
| Hypothetical-based EQ-5D-5L score | 0.91 (0.90, 0.92) | 0.91 (0.91, 0.92) | 0.01 (-0.00, 0.02)         | 0.75 (0.72, 0.78) | 0.74 (0.70, 0.78) | -0.01 (-0.06, 0.05)        |
| Experience-based EQ-5D-5L score   | 0.87 (0.86, 0.87) | 0.87 (0.86, 0.88) | 0.00 (-0.00, 0.01)         | 0.75 (0.73, 0.77) | 0.75 (0.72, 0.77) | 0.00 (-0.03, 0.03)         |
| WPAI–activity impairment          | 25 (24, 26)       | 27 (26, 29)       | 2.5 (0.9, 4.1)             | 47 (43, 52)       | 51 (46, 56)       | 3.9 (-2.2, 10.2)           |
